# Supplementary material for: Synthesis of Al-incorporated sulfated zirconia with improved and stabilized surface sulfur species for removal of trace olefins from aromatics
Source: Royal Society of Chemistry journal article supplement (doi:10.1039/d1cy01443a), 2021-11-13
Supplement: d1cy01443a1.pdf [file d1cy01443a1.pdf]

## Supporting Information for :

Synthesis of Al-incorporated sulfated zirconia with improved and stabilized  
surface sulfur species for removal of trace olefins from aromatics

Sitan Wang, Tao Yin, Xuan Meng, Naiwang Liu\*, Li Shi\*

*The State Key Laboratory of Chemical Engineering, East China University of Science and  
Technology, Shanghai 200237, People's Republic of China.*

E-mail: yyshi@ecust.edu.cn; liunw@ecust.edu.cn

\*Corresponding author: Li Shi; Tel: +021-64252274;

### Supplementary Figures:

Figure S1. Relationship between surface S concentration and Brønsted acidity and with the  
ratio of total B/total L in the catalysts.

Figure S2. The mass spectra of reaction products (a. 16.392, b. 16.506, c. 16.817min).

Figure S3. Hourly conversion of olefins from aromatics upon SZ, Al<sub>x</sub>-SZ and different  
commercial solid acid catalysts.

Figure S4. FT-IR spectra of Al<sub>2.50</sub>-SZ-R5 (activated) and SZ-R2 (activated) after pyridine  
adsorption at 80 °C and desorption at (a) 200 °C; and (b) 450 °C.

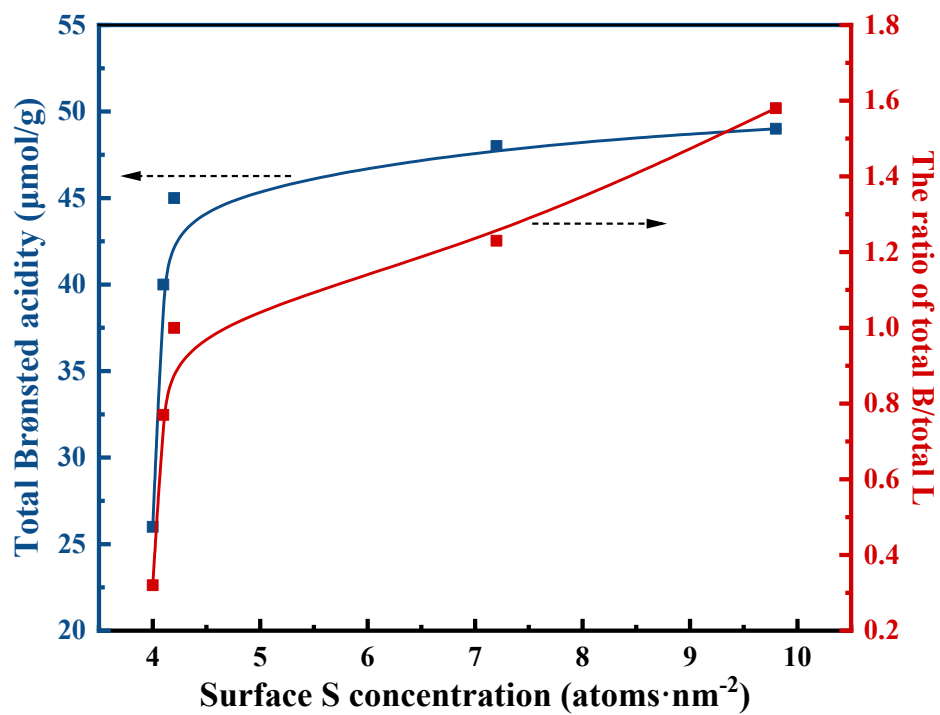

**Figure S1.** Relationship between surface S concentration and Brønsted acidity and with the ratio of total B/total L in the catalysts.

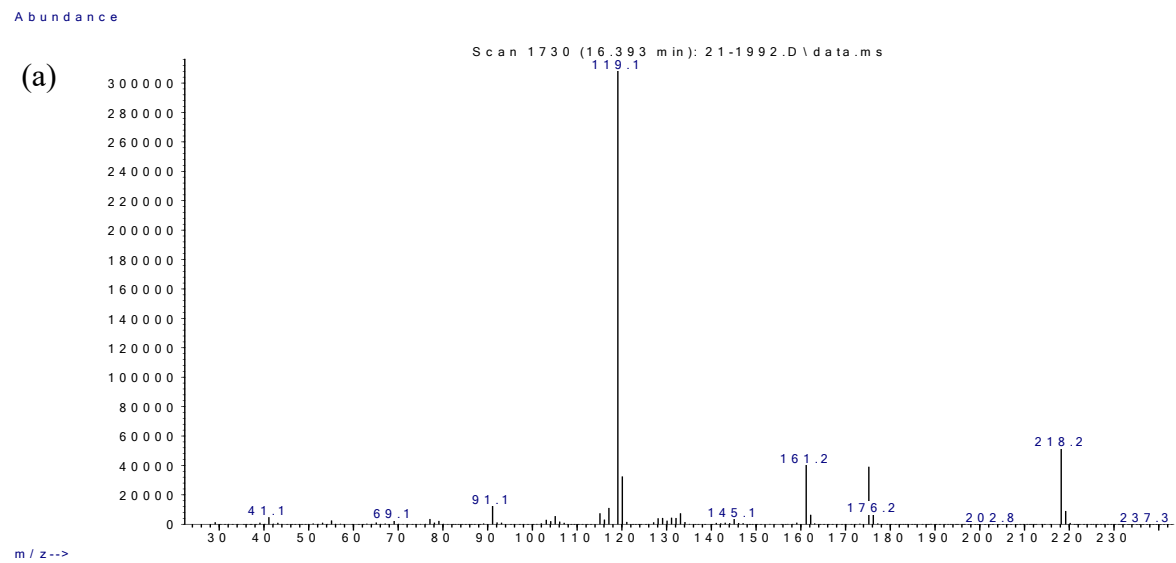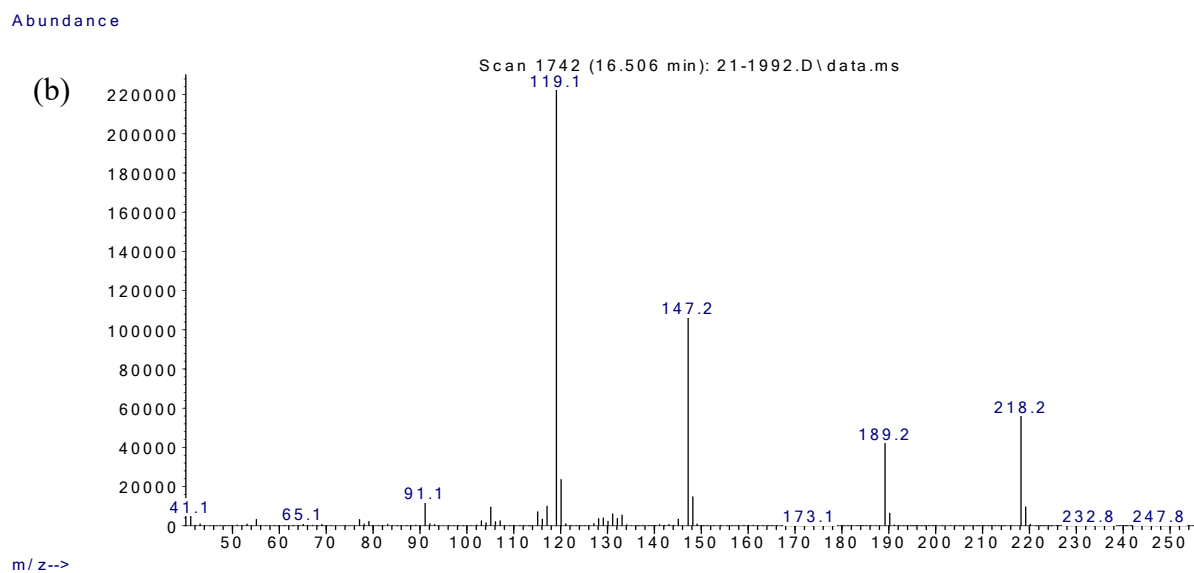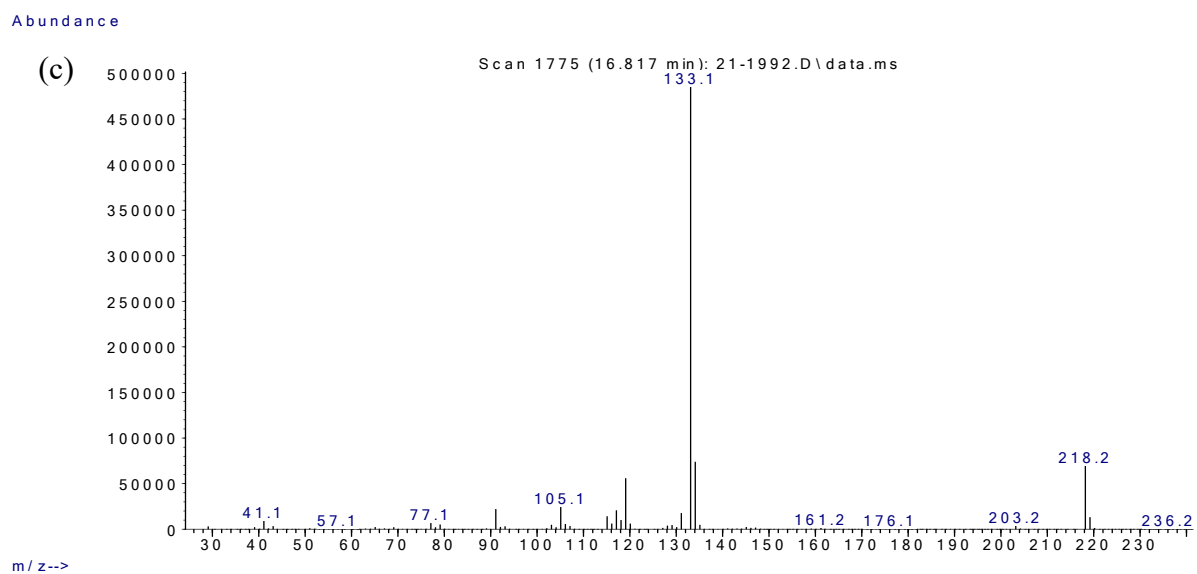

**Figure S2.** The mass spectra of reaction products (a. 16.392, b. 16.506, c. 16.817min).

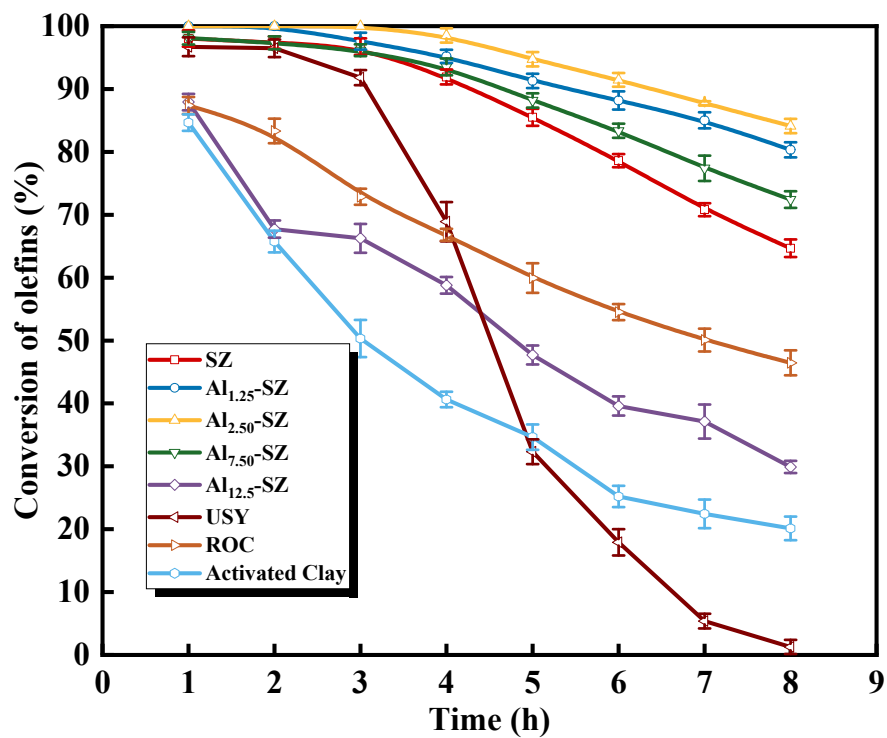

**Figure S3.** Hourly conversion of olefins from aromatics upon SZ, Al<sub>x</sub>-SZ and different commercial solid acid catalysts.

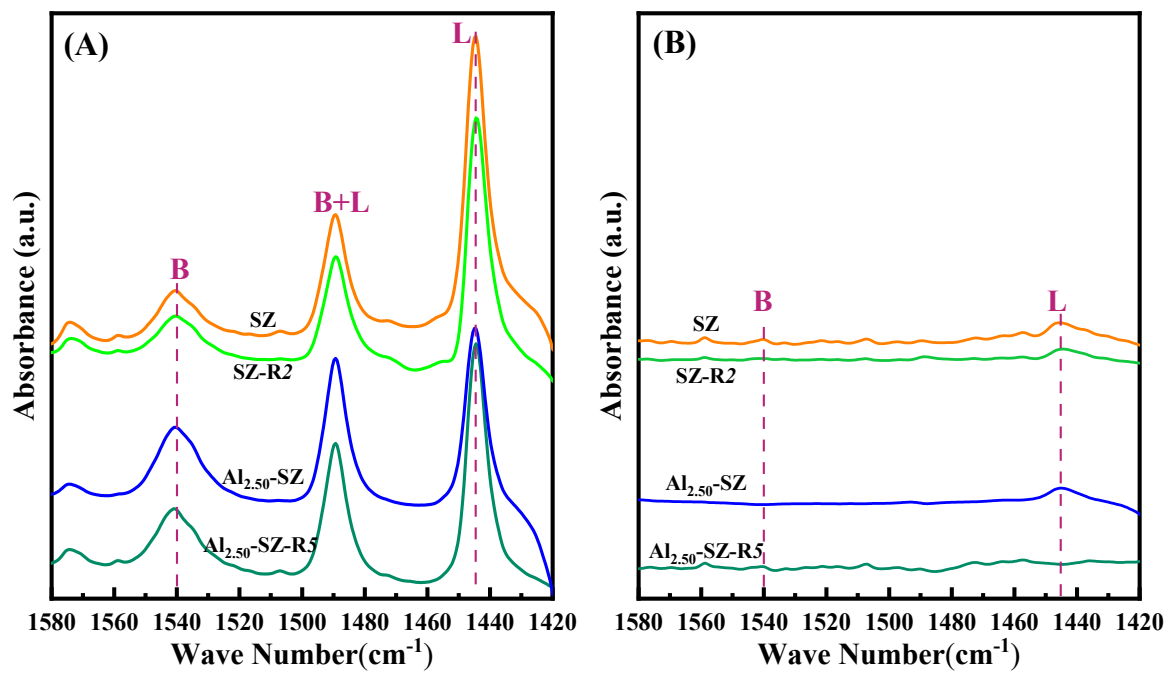

**Figure S4.** FT-IR spectra of Al<sub>2.50</sub>-SZ-R5 (activated) and SZ-R2 (activated) after pyridine adsorption at 80 °C and desorption at (a) 200 °C; and (b) 450 °C.
